# Supplementary material for: Computational analysis reveals histotype-dependent molecular profile and actionable mutation effects across cancers
Source: Genome Med. 2018 Nov 15;10:83. doi: 10.1186/s13073-018-0591-9 (PMC6238410; doi:10.1186/s13073-018-0591-9)
Supplement: Supplementary file 4 — Actionable genes. A table with details on all actionable genes analyzed. (XLSX 14 kb) [file 13073_2018_591_MOESM4_ESM.xlsx]

## Sheet: Table S2
TABLE S3
Gene	Mutations	Actionable tumor type	Drug	included in paper	comment
BRAF	V600D, V600E, V600G, V600K, V600M, V600R	Melanoma	Cobimetinib+Vemurafenib	y
BRAF	V600E, V600K	Melanoma	Trametinib	n	redunandt results to DEGKMR
EGFR	729_761del, 729_761indel, L858R	Non-Small Cell Lung Cancer	Afatinib	y
	729_761del, 729_761indel, L858R	Non-Small Cell Lung Cancer	Erlotinib
	729_761del, 729_761indel, L858R	Non-Small Cell Lung Cancer	Gefitinib
	729_761ins	Non-Small Cell Lung Cancer	Afatinib, Erlotinib, Gefitinib
	A750P	Non-Small Cell Lung Cancer	Afatinib, Erlotinib, Gefitinib
	A763_Y764insFQEA	Non-Small Cell Lung Cancer	Afatinib, Erlotinib, Gefitinib
	E709_T710delinsD	Non-Small Cell Lung Cancer	Afatinib, Erlotinib, Gefitinib
	E709K	Non-Small Cell Lung Cancer	Afatinib, Erlotinib, Gefitinib
	EGFR-KDD	Non-Small Cell Lung Cancer	Afatinib, Erlotinib, Gefitinib
	G719A, G719C, G719D, G719S	Non-Small Cell Lung Cancer	Afatinib, Erlotinib, Gefitinib
	L747P	Non-Small Cell Lung Cancer	Afatinib, Erlotinib, Gefitinib
	L833V	Non-Small Cell Lung Cancer	Afatinib, Erlotinib, Gefitinib
	L861Q, L861R	Non-Small Cell Lung Cancer	Afatinib, Erlotinib, Gefitinib
	S768I	Non-Small Cell Lung Cancer	Afatinib, Erlotinib, Gefitnib
EGFR	T790M	Non-Small Cell Lung Cancer	Osimertinib	n	insufficient cases
ERBB2	Amplification	Breast Cancer	Ado-trastuzumab emtansine	y
	Amplification	Breast Cancer	Lapatinib
	Amplification	Breast Cancer	Lapatinib+Trastuzumab
	Amplification	Breast Cancer	Pertuzumab+Trastuzumab
	Amplification	Breast Cancer	Trastuzumab
	Amplification	Esophagogastric Cancer	Trastuzumab
KIT	449_514mut, 550_592mut, A502_Y503dup, D579del, D820G, E554_K558del, H697Y, K550_W557del, K558delinsNP, L576P, P551_M552del, V555_L576del, V560D, V560del, V654A	Gastrointestinal Stromal Tumor	Sunitinib	n	redunandt to Imatitinib
KIT	449_514mut, 550_592mut, D419del, D579del, E554_I571del, E554_K558del, E554_V559del, F522C, I563_L576del, I653T, K550_W557del, K558N, K558_E562del, K558_V559del, K558delinsNP, K642E, L576P, M541L, M552_W557del, N564_Y578del, N822H, N822Y, P573_D579del, P577_W582delinsPYD, P838L, Q556_K558del, T417_D419delinsI, T417_D419delinsRG, T574insTQLPYD, V530I, V555_L576del, V555_V559del, V559C, V559D, V559G…	Gastrointestinal Stromal Tumor	Imatinib	y
KIT	449_514mut, 550_592mut, D820G, D820Y, K550_W557del, K558delinsNP, N822K, V560D	Gastrointestinal Stromal Tumor	Regorafenib	n	redunandt to Imatitinib
CDK4	Amplification	Dedifferentiated Liposarcoma	Abemaciclib, Palbociclib	y
CDK4	Amplification	Well-Differentiated Liposarcoma	Abemaciclib, Palbociclib
KIT	449_514mut, 550_592mut, A502_Y503dup, D579del, D820G, E554_K558del, H697Y, K550_W557del, K558delinsNP, L576P, P551_M552del, V555_L576del, V560D, V560del, V654A	Thymic Tumor	Sunitinib	n	redunandt to Imatitinib
KIT	D816F, D816Y, D820G, D820Y, L576P, N822I, V559D, V560G, W557_K558del	Gastrointestinal Stromal Tumor	Dasatinib	n	redunandt to Imatitinib
KIT	D816V, D820A, D820G, D820Y, K642E, L576P, V555_L576del, V559C, V559D, V654A, W557_K558del	Gastrointestinal Stromal Tumor	Nilotinib	n	redunandt to Imatitinib
KIT	D820A, D820E, D820G, D820Y, K642E, N505I, P577_D579del, W557_K558del	Gastrointestinal Stromal Tumor	Sorafenib	n	redunandt to Imatitinib
KIT	D820A, D820E, D820G, D820Y, K642E, N505I, P577_D579del, W557_K558del	Thymic Tumor	Sorafenib	n	redunandt to Imatitinib
MET	Amplification	Non-Small Cell Lung Cancer	Crizotinib	y
MET	Amplification	Renal Cell Carcinoma	Cabozantinib
MET	D1010H, D1010N, D1010Y	Non-Small Cell Lung Cancer	Crizotinib
PDGFRA	560_561insER, A633T, C450_K451insMIEWMI, C456_N468del, C456_R481del, D568N, D842I, D842_H845del, D842_M844del, D846Y, E311_K312del, G853D, H650Q, H845Y, H845_N848delinsP, I843del, N659K, N659R, N659S, N848K, P577S, Q579R, R748G, R841K, S566_E571delinsR, S584L, V469A, V536E, V544_L555insAVLVLLVIVIISLI, V561A, V561D, V561_I562insER, V568A, V658A, W559_R560del, Y375_K455del, Y555C, Y849C, Y849S	Gastrointestinal Stromal Tumor	Imatinib	n	insufficient cases
PDGFRA	D842V	Gastrointestinal Stromal Tumor	Dasatinib	n	insufficient cases
AKT1	E17K	Breast Cancer	AZD5363	n	insufficient cases
AKT1	E17K	Ovarian Cancer	AZD5363
ALK	L1196M, L1196Q	Non-Small Cell Lung Cancer	Brigatinib	n	insufficient cases
ARAF	S214A	Histiocytosis	Sorafenib	n	insufficient cases
ARAF	S214C	Non-Small Cell Lung Cancer	Sorafenib
BRAF	K601E	Melanoma	Trametinib	n	insufficient cases
BRAF	L597Q, L597R, L597S, L597V	Melanoma	Trametinib
ERBB2	V659E	Non-Small Cell Lung Cancer	Lapatinib	n	insufficient cases
FGFR1	Amplification	Lung Squamous Cell Carcinoma	AZD4547	y
FGFR1	Amplification	Lung Squamous Cell Carcinoma	Debio1347
FGFR3	G370C, G380R, K650E, K650M, K650N, K650Q, K650R, K650T, R248C, S249C, S371C, Y373C, Y375C	Bladder Cancer	Debio1347	y
	G370C, G380R, K650E, K650M, K650N, K650Q, K650R, K650T, R248C, S249C, S371C, Y373C, Y375C	Bladder Cancer	JNJ-42756493
FLT3	Y572_Y630ins	Acute Myeloid Leukemia	Sorafenib	n	insufficient cases
IDH1	R132C, R132G, R132H, R132Q	Acute Myeloid Leukemia	AG-120	y
	R132C, R132G, R132H, R132Q	Cholangiocarcinoma	AG-120
	R132C, R132G, R132H, R132Q	Glioma	AG-120
	R132C, R132G, R132H, R132Q	Intrahepatic Cholangiocarcinoma	AG-120
IDH2	R140Q, R172G, R172K, R172M, R172S	All Liquid Tumors	AG-221	n	no actionable tumor type in tcga
JAK2	PCM1-JAK2 Fusion	Leukemia	Ruxolitinib	n	insufficient cases
KRAS	Oncogenic Mutations	Colorectal Cancer	Atezolizumab+Cobimetinib
MDM2	Amplification	Liposarcoma	DS-3032b	y
	Amplification	Liposarcoma	RG7112
MET	D1010H, D1010N, D1010Y	Non-Small Cell Lung Cancer	Cabozatinib	n	insufficient cases
MTOR	E2014K	Bladder Cancer	Everolimus	n	insufficient cases
NRAS	G12, G13, Q61, A146V	Colorectal Cancer	Atezolizumab+Cobimetinib	y
NRAS		Melanoma	Binimetinib
NRAS		Melanoma	Binimetinib+Ribociclib
NRAS		Thyroid Cancer	Radioiodine Uptake Therapy+Selumetinib
PIK3CA	E543K, E545, Q546, D549N, H1047L, H1047R	Breast Cancer	Alpelisib+Fulvestrant	y
		Breast Cancer	Buparlisib+Fulvestrant
		Breast Cancer	Copanlisib
		Breast Cancer	Fulvestrant+Taselisib
		Breast Cancer	GDC0077
		Breast Cancer	Serabelisib
ROS1	D2033N	Non-Small Cell Lung Cancer	Cabozantinib	n	insufficient cases
